# Supplementary material for: The Long Noncoding RNA HEAL Regulates HIV-1 Replication through Epigenetic Regulation of the HIV-1 Promoter
Source: PubMed Central journal article supplement (PMC6759764; doi:10.1128/mbio.02016-19), 2019-09-24

Figure S3 (Related to Figure 6)

**A**

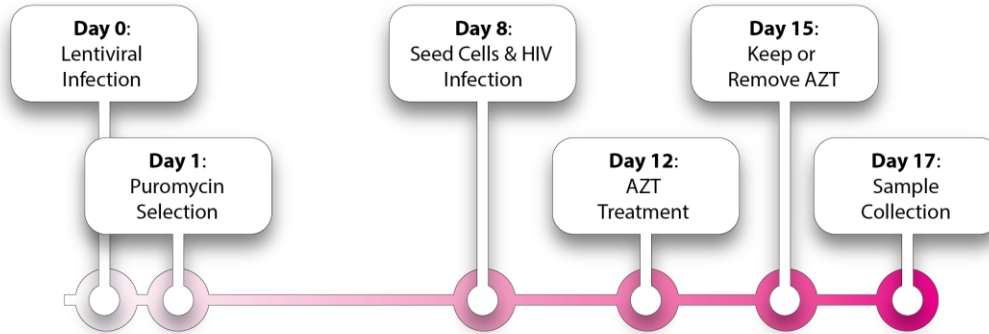

**B**

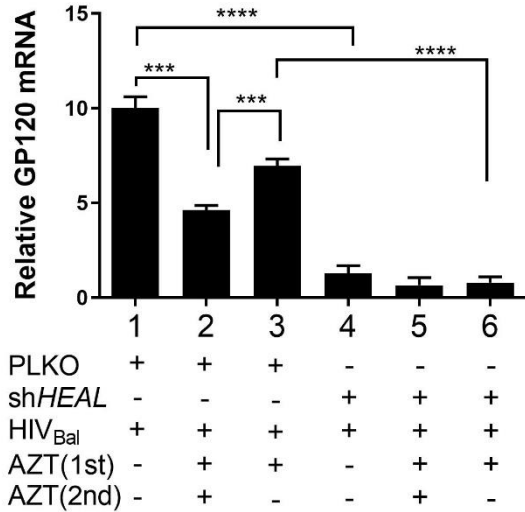

Supplement: mBio.02016-19-sf003.pdf [file mBio.02016-19-sf003.pdf]
